# Supplementary material for: Adhesion G Protein-Coupled Receptor G2 Promotes Hepatocellular Carcinoma Progression and Serves as a Neutrophil-Related Prognostic Biomarker
Source: MDPI journal article supplement (doi:10.3390/ijms242316986), 2023-11-30
Supplement: s1 [file s1]

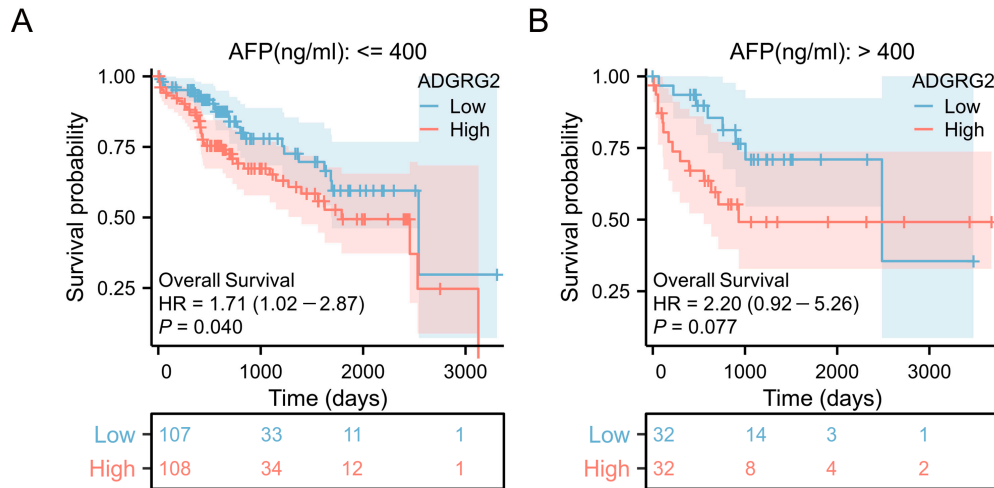

**Figure S1.** The clinical subgroup survival curves for patients with HCC presenting with high and low ADGRG2 expression. (A) AFP ≤ 400 ng/ml. (B) AFP > 400 ng/ml.

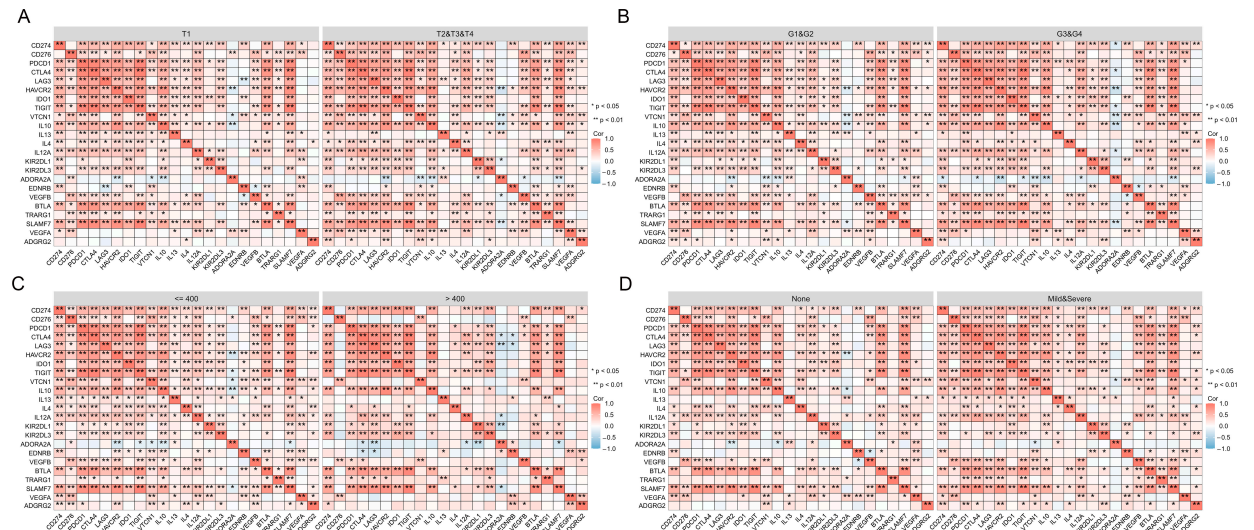

**Figure S2.** The correlation between immune checkpoints and ADGRG2 in clinical subgroups. (A) Pathologic\_T\_stage (T1 vs T2&T3&T4). (B) Histologic\_grade (G1&G2 vs G3&G4). (C) AFP (≤ 400 ng/ml vs > 400 ng/ml). (D) Adjacent\_hepatic\_tissue\_inflammation (None vs Mild&Severe).

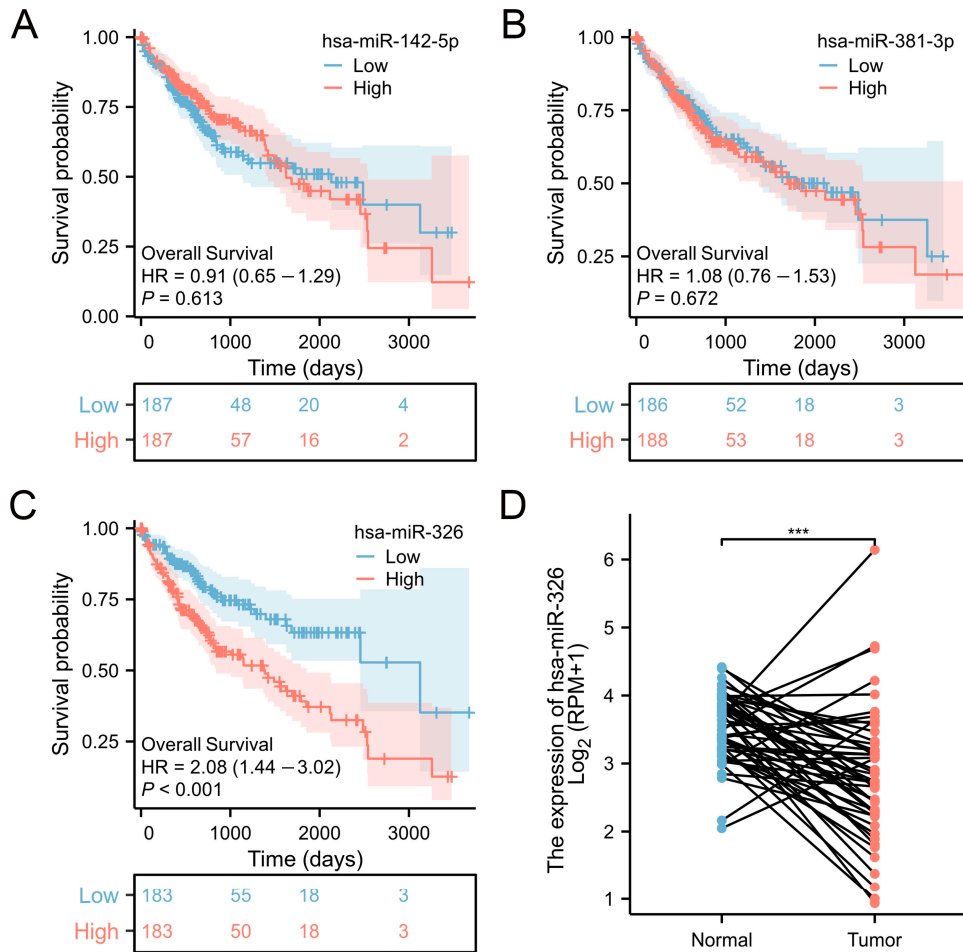

**Figure S3.** The prognostic value of miRNA expression in patients with HCC. (A-C) miR-142-5p, miR-381-3p, miR-326. (D) The expression of miR-326 in TCGA paired samples.

**Table S1.** Sixteen NETs-related genes with prognostic potential.

| Gene_name     | Gene_id         | HR    | CI          | p.Cox    |
|---------------|-----------------|-------|-------------|----------|
| <i>AKT1</i>   | ENSG00000142208 | 1.811 | 1.272-2.579 | 0.000992 |
| <i>ATG7</i>   | ENSG00000197548 | 1.768 | 1.243-2.515 | 0.001539 |
| <i>S100A9</i> | ENSG00000163220 | 1.522 | 1.073-2.157 | 0.018395 |
| <i>ENO1</i>   | ENSG00000074800 | 1.982 | 1.390-2.826 | 0.000157 |
| <i>ACTN4</i>  | ENSG00000130402 | 1.419 | 1.004-2.006 | 0.04752  |
| <i>ACTN1</i>  | ENSG00000072110 | 1.444 | 1.022-2.041 | 0.037306 |
| <i>ACTG1</i>  | ENSG00000184009 | 1.568 | 1.106-2.221 | 0.01143  |
| <i>ACTB</i>   | ENSG00000075624 | 1.472 | 1.038-2.087 | 0.030127 |
| <i>TK1</i>    | ENSG00000167900 | 1.457 | 1.030-2.061 | 0.033187 |
| <i>MNDA</i>   | ENSG00000163563 | 1.570 | 1.101-2.239 | 0.012645 |
| <i>SELP</i>   | ENSG00000174175 | 0.687 | 0.485-0.973 | 0.034431 |
| <i>PIK3CA</i> | ENSG00000121879 | 1.458 | 1.026-2.072 | 0.035419 |
| <i>CYBB</i>   | ENSG00000165168 | 1.474 | 1.037-2.095 | 0.030489 |
| <i>CXCL8</i>  | ENSG00000169429 | 1.737 | 1.217-2.477 | 0.002327 |
| <i>MAPK3</i>  | ENSG00000102882 | 1.777 | 1.252-2.523 | 0.001298 |
| <i>MMP9</i>   | ENSG00000100985 | 1.856 | 1.303-2.643 | 0.000616 |

**Table S2.** Correlation between ADGRG2 expression and chemokines in HCC.

| Chemokine    | Correlation | <i>p</i> Value        | Chemokine     | Correlation | <i>p</i> Value        |
|--------------|-------------|-----------------------|---------------|-------------|-----------------------|
| <i>CCL1</i>  | 0.109       | $3.55 \times 10^{-2}$ | <i>CCL26</i>  | 0.248       | $1.31 \times 10^{-6}$ |
| <i>CCL2</i>  | 0.137       | $8.07 \times 10^{-3}$ | <i>CCL27</i>  | -0.005      | $9.21 \times 10^{-1}$ |
| <i>CCL3</i>  | 0.01        | $8.41 \times 10^{-1}$ | <i>CCL28</i>  | 0.194       | $1.69 \times 10^{-4}$ |
| <i>CCL4</i>  | 0.062       | $2.36 \times 10^{-1}$ | <i>CX3CL1</i> | -0.055      | $2.93 \times 10^{-1}$ |
| <i>CCL5</i>  | 0.098       | $5.84 \times 10^{-2}$ | <i>CXCL1</i>  | 0.305       | $1.99 \times 10^{-9}$ |
| <i>CCL7</i>  | 0.062       | $2.31 \times 10^{-1}$ | <i>CXCL2</i>  | 0.122       | $1.9 \times 10^{-2}$  |
| <i>CCL8</i>  | 0.044       | $3.97 \times 10^{-1}$ | <i>CXCL3</i>  | 0.235       | $4.87 \times 10^{-6}$ |
| <i>CCL11</i> | 0.194       | $1.71 \times 10^{-4}$ | <i>CXCL5</i>  | 0.212       | $3.99 \times 10^{-5}$ |
| <i>CCL13</i> | 0.1         | $5.38 \times 10^{-2}$ | <i>CXCL6</i>  | 0.275       | $7.53 \times 10^{-8}$ |
| <i>CCL14</i> | -0.071      | $1.74 \times 10^{-1}$ | <i>CXCL8</i>  | 0.305       | $1.98 \times 10^{-9}$ |
| <i>CCL15</i> | 0.026       | $6.22 \times 10^{-1}$ | <i>CXCL9</i>  | 0.106       | $4.11 \times 10^{-2}$ |
| <i>CCL16</i> | -0.191      | $2.08 \times 10^{-4}$ | <i>CXCL10</i> | 0.152       | $3.26 \times 10^{-3}$ |
| <i>CCL17</i> | 0.073       | $1.61 \times 10^{-1}$ | <i>CXCL11</i> | 0.214       | $3.19 \times 10^{-5}$ |
| <i>CCL18</i> | -0.029      | $5.74 \times 10^{-1}$ | <i>CXCL12</i> | 0.005       | $9.31 \times 10^{-1}$ |
| <i>CCL19</i> | 0.099       | $5.61 \times 10^{-2}$ | <i>CXCL13</i> | 0.223       | $1.49 \times 10^{-5}$ |
| <i>CCL20</i> | 0.141       | $6.56 \times 10^{-3}$ | <i>CXCL14</i> | 0.118       | $2.25 \times 10^{-2}$ |
| <i>CCL21</i> | 0.073       | $1.6 \times 10^{-1}$  | <i>CXCL16</i> | 0.177       | $6.17 \times 10^{-4}$ |
| <i>CCL22</i> | 0.11        | $3.37 \times 10^{-2}$ | <i>CXCL17</i> | -0.04       | $4.43 \times 10^{-1}$ |
| <i>CCL23</i> | 0.026       | $6.17 \times 10^{-1}$ | <i>XCL1</i>   | 0.026       | $6.24 \times 10^{-1}$ |
| <i>CCL24</i> | -0.013      | $8.06 \times 10^{-1}$ | <i>XCL2</i>   | 0.008       | $9.02 \times 10^{-2}$ |
| <i>CCL25</i> | 0.094       | $6.91 \times 10^{-2}$ |               |             |                       |

**Table S3.** Correlation between ADGRG2 expression and chemokine receptors in HCC.

| Chemokine receptor | Correlation | <i>p</i> Value        |
|--------------------|-------------|-----------------------|
| <i>CCR1</i>        | 0.17        | $9.84 \times 10^{-4}$ |
| <i>CCR2</i>        | 0.174       | $7.51 \times 10^{-4}$ |
| <i>CCR3</i>        | 0.154       | $5.13 \times 10^{-3}$ |
| <i>CCR4</i>        | 0.151       | $3.55 \times 10^{-3}$ |
| <i>CCR5</i>        | 0.138       | $7.78 \times 10^{-3}$ |
| <i>CCR6</i>        | 0.114       | $2.87 \times 10^{-2}$ |
| <i>CCR7</i>        | 0.051       | $3.23 \times 10^{-1}$ |
| <i>CCR8</i>        | 0.156       | $2.67 \times 10^{-3}$ |
| <i>CCR9</i>        | 0.164       | $1.55 \times 10^{-3}$ |
| <i>CCR10</i>       | 0.094       | $7.1 \times 10^{-2}$  |
| <i>CX3CR1</i>      | 0.174       | $7.4 \times 10^{-4}$  |
| <i>CXCR1</i>       | 0.126       | $1.51 \times 10^{-2}$ |
| <i>CXCR2</i>       | 0.219       | $2.02 \times 10^{-5}$ |
| <i>CXCR3</i>       | 0.13        | $1.24 \times 10^{-2}$ |
| <i>CXCR4</i>       | 0.116       | $2.53 \times 10^{-2}$ |
| <i>CXCR5</i>       | 0.051       | $3.26 \times 10^{-1}$ |
| <i>CXCR6</i>       | 0.15        | $3.79 \times 10^{-3}$ |
| <i>XCR1</i>        | 0.135       | $9.4 \times 10^{-3}$  |

**Table S4.** Primers for quantitative RT-PCR.

| <b>Gene</b>   | <b>Forward 5'-3'</b> | <b>Reverse 5'-3'</b>    |
|---------------|----------------------|-------------------------|
| <i>ADGRG2</i> | ACGAATGGCACCTTAACTGG | ACAGCAGCAGTGTTCCATT     |
| <i>CXCL8</i>  | GCAGAGGGTTGTGGAGAAGT | AAGGCAGATACCTAATGACGATT |
| <i>ENO1</i>   | CGAGACCCAGTGGCTAGAAG | ATGGGCTGTGGGTTCTAAGG    |
| <i>PIK3CA</i> | TGGGACCCGATGCGGTTAG  | TCACCTGATGATGGTCGTGG    |
| <i>AKT1</i>   | CAGCCTGGGTCAAAGAAGTC | CTCACGTTGGTCCACATCCT    |
| <i>ATG7</i>   | CTGTGGTTGCCGGAAGTTG  | GTCCTTGGGAGCTTCATCC     |
| <i>S100A9</i> | CCTCCCACGAGAAGATGCAC | CCTGGCCTCCTGATTAGTGG    |
| <i>ACTG1</i>  | CCGAGCCGTGTTTCCTTCC  | GCCATGCTCAATGGGGTACT    |
| <i>GAPDH</i>  | CGACCACTTTGTCAAGCTCA | AGGGGTCTACATGGCAACTG    |
